# Supplementary material for: Transcriptome Analysis of Genes Involved in Dendrobine Biosynthesis in Dendrobium nobile Lindl. Infected with Mycorrhizal Fungus MF23 (Mycena sp.)
Source: PubMed Central journal article supplement (PMC5428410; doi:10.1038/s41598-017-00445-9), 2017-03-22
Supplement: 41598_2017_445_MOESM1_ESM.pdf [file 41598_2017_445_MOESM1_ESM.pdf]

# **Transcriptome Analysis of Genes Involved in Dendrobine Biosynthesis in *Dendrobium nobile* Lindl. Infected with Mycorrhizal Fungus MF23 (*Mycena* sp.)**

Qing Li, Gang Ding, Biao Li\* & Shun-Xing Guo\*

Institute of Medicinal Plant Development, Peking Union Medical College, Chinese Academy of Medical Sciences, Beijing 100193, People's Republic of China

\*Corresponding author: B. L. [libiao@126.com](mailto:libiao@126.com); S. X. G. [sxguo1986@163.com](mailto:sxguo1986@163.com)

**Supplementary Figure S1. The effect of MF23 on growth of *D. nobile* tissue culture seedlings.**

**Supplementary Figure S2. Length distribution of assembled unigenes.**

**Supplementary Figure S3. Terpenoid backbone biosynthesis pathway.**

**Supplementary Figure S4. Sesquiterpenoid and triterpenoid biosynthesis pathway.**

**Supplementary Figure S5. qRT-PCR analysis of key enzyme-coding genes involved in the MEP pathway in *D. nobile*.**

**Supplementary Figure S6. The structure of humulene.**

**Supplementary Table S1. Summary of sequences analysis.**

**Supplementary Table S2. BLAST analysis of non-redundant unigenes against public databases.**

**Supplementary Table S3. Unigenes involved in backbone formation of sesquiterpene alkaloid dendrobine biosynthesis.**

**Supplementary Table S4. Recovery test of dendrobine.**

**Supplementary Table S5. Primers designed for qRT-PCR.**

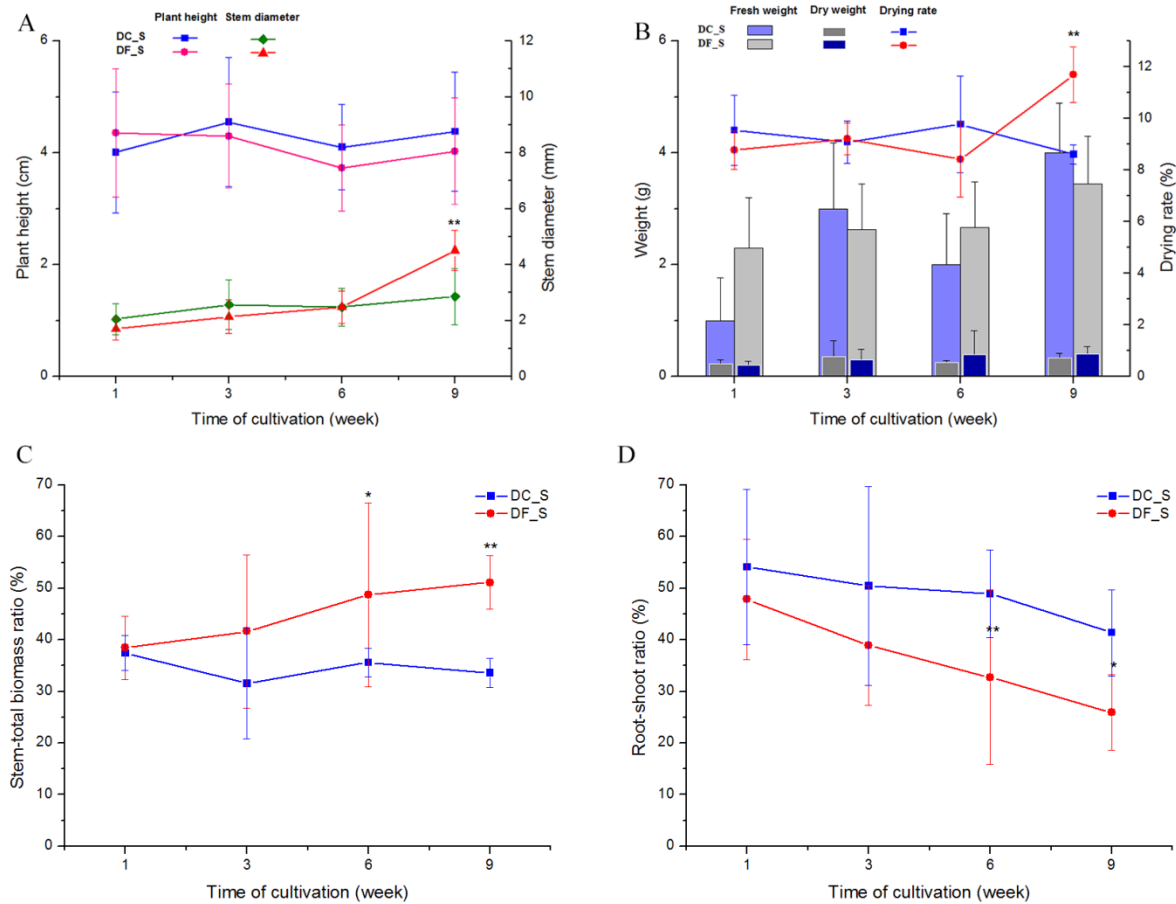

**Supplementary Figure S1. The effect of MF23 on the growth of *D. nobile* tissue culture seedlings. (A)** Plant height and stem diameter of *D. nobile* tissue culture seedlings. **(B)** Biomass of *D. nobile* tissue culture seedlings. **(C)** Stem-total biomass ratio of *D. nobile* tissue culture seedlings. **(D)** Root-shoot ratio of *D. nobile* tissue culture seedlings. DC\_S represents for control group, DF\_S represents for model group. Values are presented as the means  $\pm$ SD (n=12); values with \* are of statistical significance at  $P < 0.05$ , values with \*\* are of statistical significance at  $P < 0.01$ .

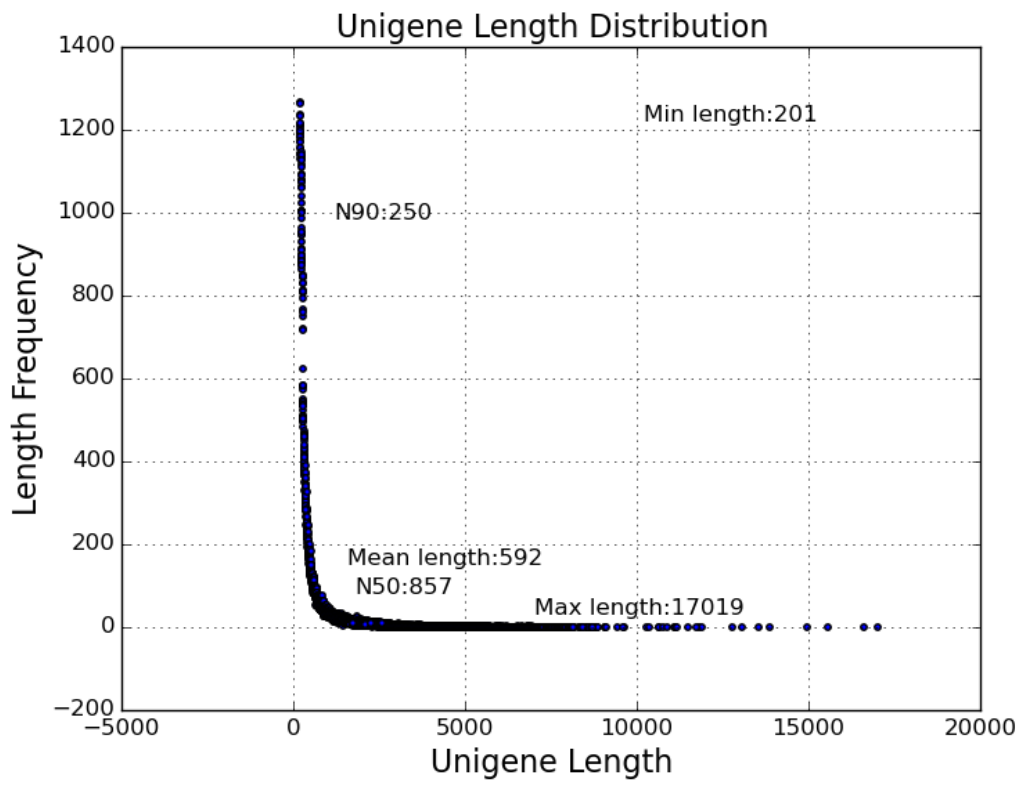

Supplementary Figure S2. Length distribution of assembled unigenes.

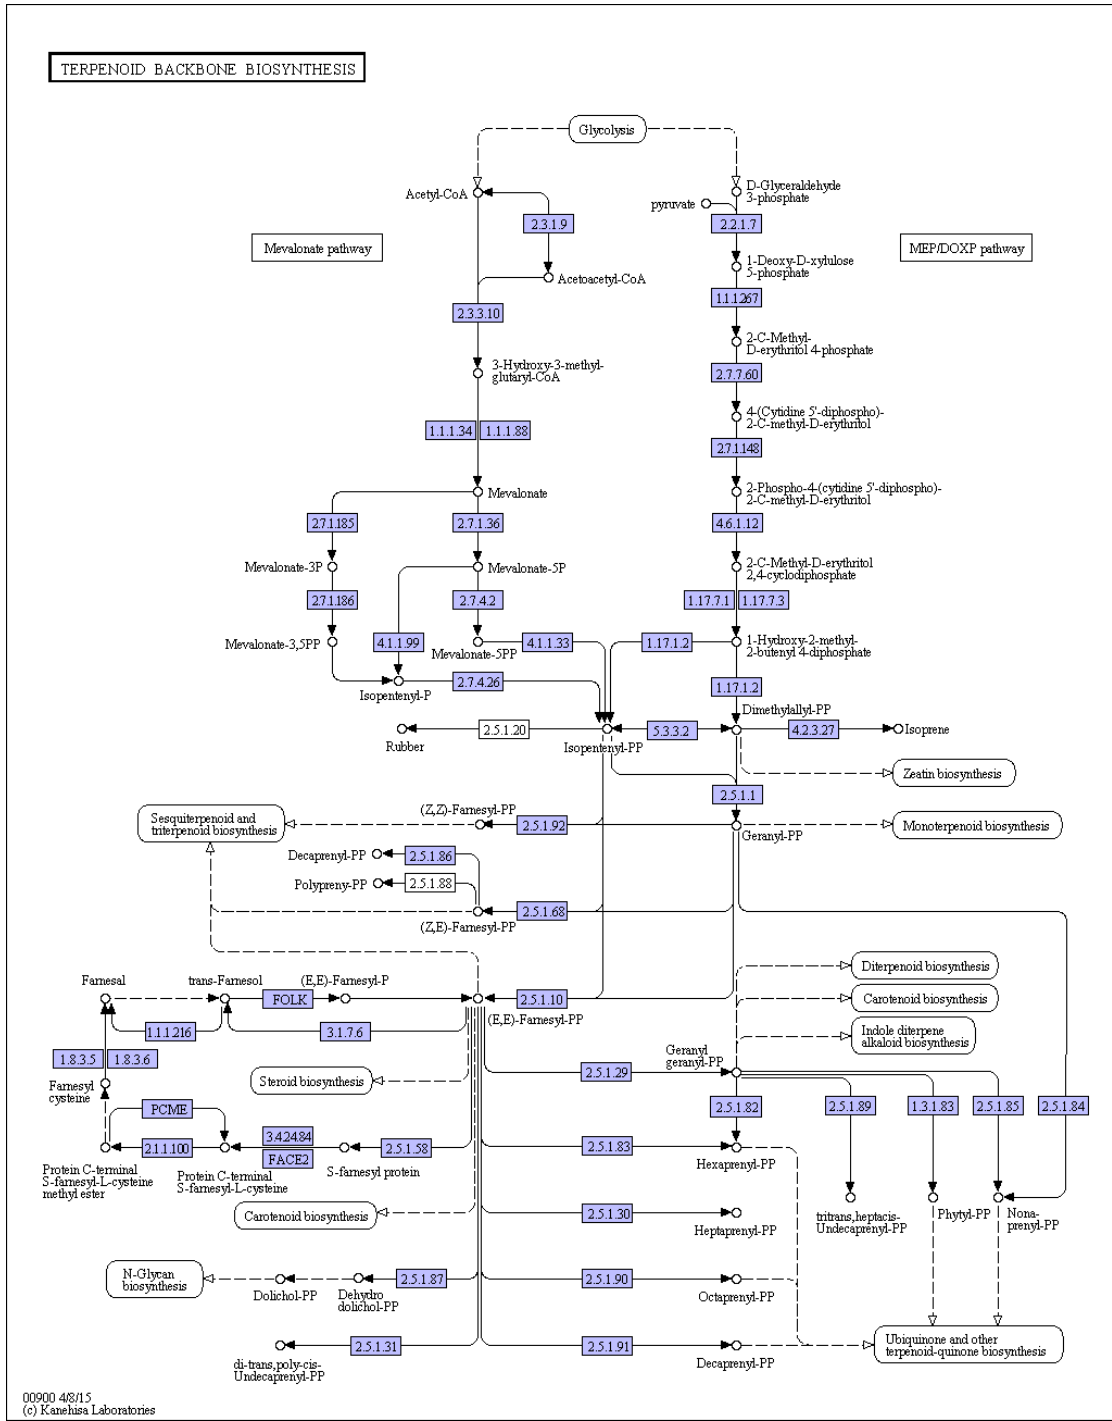

**Supplementary Figure S3. Terpenoid backbone biosynthesis pathway (derived from KEGG map00900).**

SEQUIQUERENOID AND TRITERPENOID BIOSYNTHESIS

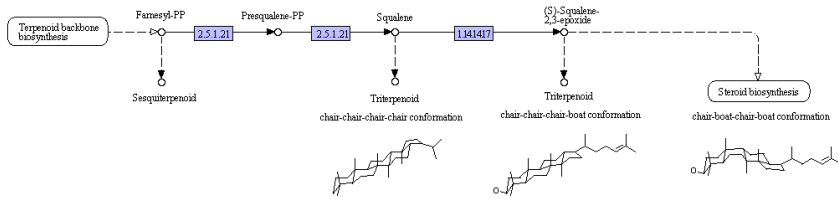

Sesquiterpenoid

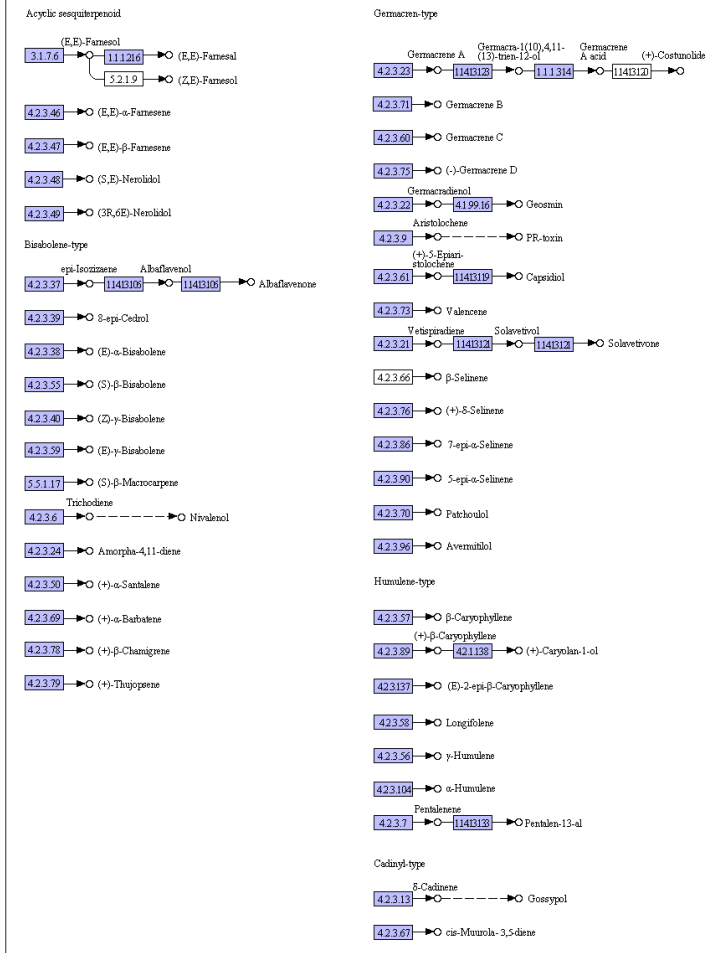

Triterpenoid chair-chain-chair conformation

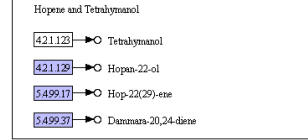

Triterpenoid chair-chain-chair-boat conformation

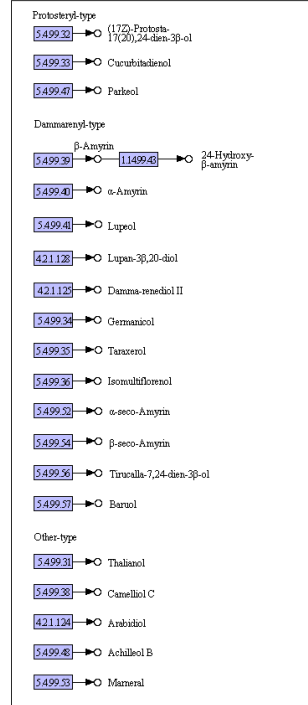

00099 120.415  
(c) Kanehisa Laboratories

Supplementary Figure S4. Sesquiterpenoid and triterpenoid biosynthesis pathway (derived from KEGG map00909).

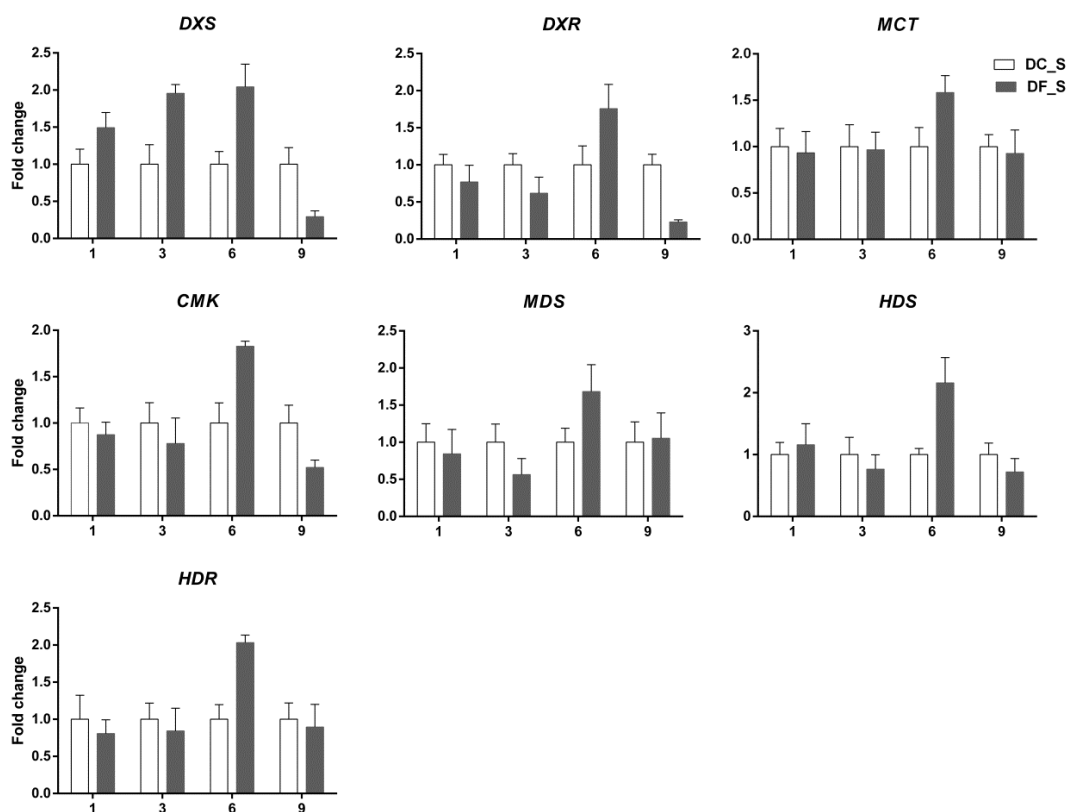

**Supplementary Figure S5. qRT-PCR analysis of key enzyme-coding genes involved in the MEP pathway in *D. nobile*.** The y-axes correspond to the mean fold changes in expression values, and the x-axes display the times of symbiotic culture (/weeks). White bars represent the control group (DC\_S), and grey bars represent the model group (DF\_S). For each qRT-PCR validation, three technical replicates were used, with a minimum of three biological replicates.

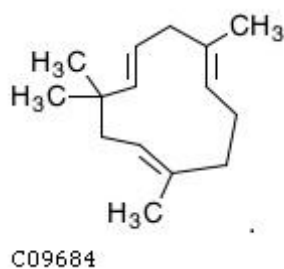

**Supplementary Figure S6. The structure of humulene.**

**Supplementary Table S1. Summary of sequences analysis.**

| Sample | Raw Reads | Clean Reads | Clean Bases | Error(%) | Q20(%) | Q30(%) | GC Content (%) |
|--------|-----------|-------------|-------------|----------|--------|--------|----------------|
| DC1_S1 | 57252114  | 55277910    | 8.29G       | 0.01     | 97.53  | 94.05  | 46.16          |
| DC1_S2 | 44863528  | 43312840    | 6.5G        | 0.01     | 97.56  | 94.09  | 45.75          |
| DF1_S1 | 58455694  | 56340260    | 8.45G       | 0.01     | 97.37  | 93.7   | 46.2           |
| DF1_S2 | 52912596  | 50959096    | 7.64G       | 0.01     | 97.69  | 94.33  | 47.63          |
| DC9_S1 | 47092876  | 45414294    | 6.81G       | 0.01     | 97.25  | 93.47  | 46.48          |
| DC9_S2 | 46537374  | 44964612    | 6.74G       | 0.01     | 97.49  | 93.96  | 46.59          |
| DF9_S1 | 53471134  | 51541182    | 7.73G       | 0.01     | 97.54  | 94.09  | 47.3           |

|        |          |          |        |      |       |       |       |
|--------|----------|----------|--------|------|-------|-------|-------|
| DF9_S2 | 69564340 | 67080588 | 10.06G | 0.01 | 97.55 | 94.12 | 46.94 |
|--------|----------|----------|--------|------|-------|-------|-------|

**Supplementary Table S2. BLAST analysis of non-redundant unigenes against public databases.**

| Database                           | Number of Unigenes | Percentage (%) |
|------------------------------------|--------------------|----------------|
| Annotated in NR                    | 56378              | 27.19          |
| Annotated in NT                    | 34493              | 16.64          |
| Annotated in KO                    | 18911              | 9.12           |
| Annotated in SwissProt             | 48431              | 23.36          |
| Annotated in PFAM                  | 46843              | 22.59          |
| Annotated in GO                    | 47372              | 22.85          |
| Annotated in KOG                   | 27087              | 13.06          |
| Annotated in all Databases         | 8015               | 3.86           |
| Annotated in at least one Database | 83778              | 40.41          |
| Total Unigenes                     | 207283             | 100            |

**Supplementary Table S3. Unigenes involved in backbone formation of sesquiterpene alkaloid dendrobine biosynthesis.**

| Pathway | Gene name                                                             | EC        |
|---------|-----------------------------------------------------------------------|-----------|
| MVA     | Acetyl-CoA C-acetyltransferase ( <i>AACT</i> )                        | 2.3.1.9   |
|         | Hydroxymethylglutaryl-CoA synthase ( <i>HMGS</i> )                    | 2.3.3.10  |
|         | 3-hydroxy-3-methylglutaryl coenzyme A reductase ( <i>HMGR</i> )       | 1.1.1.34  |
|         | Mevalonate kinase ( <i>MK</i> )                                       | 2.7.1.36  |
|         | Phosphomevalonate kinase ( <i>PMK</i> )                               | 2.7.4.2   |
|         | <i>Diphosphomevalonate</i> decarboxylase ( <i>MVD</i> ),              | 4.1.1.33  |
|         | Geranyl diphosphate synthase ( <i>GPPS</i> )                          | 2.5.1.1   |
|         | Farnesyl pyrophosphate synthetase ( <i>FPPS</i> )                     | 2.5.1.10  |
|         | Alpha-humulene synthase ( <i>TPS21</i> )                              | 4.2.3.104 |
| MEP     | 1-deoxy-D-xylulose-5-phosphate synthase ( <i>DXS</i> )                | 2.2.1.7   |
|         | 1-deoxy-D-xylulose-5-phosphate reductoisomerase ( <i>DXR</i> )        | 1.1.1.267 |
|         | 2-C-methyl-D-erythritol 4-phosphate cytidyltransferase ( <i>MCT</i> ) | 2.7.7.60  |
|         | 4-diphosphocytidyl-2-C-methyl-D-erythritol kinase ( <i>CMK</i> )      | 2.7.1.148 |
|         | 2C-methyl-D-erythritol 2,4-cyclodiphosphate synthase ( <i>MDS</i> )   | 4.6.1.12  |
|         | 4-hydroxy-3-methylbut-2-en-1-yl diphosphate synthase( <i>HDS</i> )    | 1.17.7.3  |
|         | 4-hydroxy-3-methylbut-2-enyl diphosphate reductase( <i>HDR</i> )      | 1.17.7.4  |

**Supplementary Table S4. Recovery test of dendrobine.**

| Dendrobine (mg) |        |        |        | Recovery (%) | Average recovery(%) | RSD(%) |
|-----------------|--------|--------|--------|--------------|---------------------|--------|
| Samples level   | added  | Total  | Found  |              |                     |        |
| 0.6089          | 0.5040 | 1.1129 | 1.1074 | 98.9         | 101.9               | 1.96   |
| 0.6089          | 0.5040 | 1.1129 | 1.1238 | 102.2        |                     |        |
| 0.6089          | 0.5040 | 1.1129 | 1.1145 | 100.3        |                     |        |
| 0.6089          | 0.5040 | 1.1129 | 1.1237 | 102.1        |                     |        |

|        |        |        |        |       |
|--------|--------|--------|--------|-------|
| 0.6089 | 0.5040 | 1.1129 | 1.1328 | 104.0 |
| 0.6089 | 0.5040 | 1.1129 | 1.1327 | 104.0 |

**Supplementary Table S5. Primers designed for qRT-PCR.**

| <i>Genes</i>     | Unigene ID | forward primer sequence (5'-3') | reverse primer sequence (5'-3') |
|------------------|------------|---------------------------------|---------------------------------|
| <i>AACT</i>      | c90222_g1  | AGCCTTCCTTGGTTCATTGTGCATCT      | CTGTGCTGCTATCATTGTTGCCTTC       |
| <i>HMGS</i>      | c90508_g3  | GCGTTCAGCAGGAATCATTAGAGG        | TCTCAAGCAAGGAAGTGACAACCTGT      |
| <i>HMGR</i>      | c84175_g3  | GCCAGCAACATAGTATCAGCCATCT       | CACCACCAACAGTTCCTACCTCAAT       |
| <i>MK</i>        | c86727_g1  | GCCTGCTCAATTCTGCTATTAACA        | GCGAGTCTGACCTCCATTATTCCT        |
| <i>PMK</i>       | c89718_g2  | TGGAGGAAGCTATATGCCTGATGTG       | CTGCCAGTCGTGTCCTGTGTT           |
| <i>MVD</i>       | c89821_g1  | GGCTACGACGACTGTTGCTGTTAG        | CTGAATGCCTCGCTTCTCATCCTC        |
| <i>GPPS</i>      | c84183_g4  | AACTGGCTCAAGCTGCTGAATACT        | ACTGTCGGTTGTGGTATTGGCATAT       |
| <i>FPPS</i>      | c79611_g1  | TCACTAAGTTCAAGCGTGTCTCAG        | GCTCGTAGCTCGTCTCTCGTA           |
| <i>TPS21</i>     | c91295_g3  | GTTGCGGCATCGGAAGGTCATTA         | AGGGCGAGATGGAGTGATGGAAA         |
| <i>DXS</i>       | c89669_g1  | CGCAAAGAGCATCACAAAGCAGATT       | GGACCAGGAGCAGGCATAGACT          |
| <i>DXR</i>       | c83260_g1  | CCAACCTACTCCAACGAACTCACTT       | AACTCAATGGACATAGCGGACCTC        |
| <i>MCT</i>       | c87740_g2  | GCATCCATCGCCGTATCAATCTA         | TCCTTCACTCCAATCCCAACATCTG       |
| <i>CMK</i>       | c91297_g3  | GGCTGGCAGATGAAGTGGATAAGAA       | CGACTGGAACCTCTGGCACATTAG        |
| <i>MDS</i>       | c89629_g3  | ACGGCGAGGTCACTGCTTCT            | AGGCGTCGTTGTTGGCTTGG            |
| <i>HDS</i>       | c88411_g1  | TCACTGAGCCACCAGAAGAAGAGA        | GCAGCAAGAGACCTGTAGAGAAGTT       |
| <i>HDR</i>       | c85735_g1  | CCGTTCTCTTCTCCGTCACCAT          | GCTCCAGCGTCTCCTTCTTGT           |
| <i>CYP71D55</i>  | c76734_g1  | TGGATGAGGATCTCGTTGATGTTCT       | CCGACTGAGCCTTACGCATTATCT        |
| <i>CYP735A</i>   | c76925_g1  | GAGTGGCAGAAGGCGTTAAGAGA         | CGGCGAGTATAGACGAAGAACCT         |
| <i>CYP71D10</i>  | c73585_g1  | CGAAGCAGCGTGGCAGAGAA            | TTGGCGTTGTAGAAGATGGCGTTA        |
| <i>CYP94C1</i>   | c88693_g2  | CATTCGCCGCAAGTCTCTCGTA          | GGCTTGACTACCTTCTTCTCTCGTTA      |
| <i>At3g26840</i> | c88964_g1  | CAACTTCAATGGCTCTCGCATCTG        | GCGGCTCTACCACTGTCTCATC          |
| <i>SALAT</i>     | c84941_g1  | CGCAGTGAGAAGCCAAGTAGAGTT        | TCTCCACCTCTTCTGTCTTCTTCTC       |
| <i>METTL23</i>   | c69161_g1  | AGCGGTCATCATCTGATTGAGTTCT       | GCACTTCTTGGTTCTTCTCATCTTCA      |
| <i>ATX4</i>      | c89731_g2  | CCCAGCCAGTTTCTAAATCCCTTA        | AGCCTCTCTATTGCCAACCTTAAC        |
| <i>OMT-3</i>     | c88817_g1  | TGACTCTCGCTACCGCCATAGAA         | TCGCAGTGGAGCAGGTGAAGA           |
| <i>AAT2</i>      | c88693_g5  | TCACAGCAATGCGGCGAGTC            | CGGCAGAGGAGGAGGAGATGAAT         |
| <i>DAT</i>       | c83743_g5  | TGAATCGTGCTCCATGTTACCATTG       | CCTGCTCGCCTTCTTCTTCTCTC         |
| <i>BCAT2</i>     | c82241_g1  | GCATCATAGTCGTCGTCATCATCAT       | TCCACATCAGCATATTCATCCACAT       |
